# Supplementary material
Source: HighWire-hosted journal article supplement (https://erj.ersjournals.com/content/58/2/2002535)
Supplement: inline-supplementary-material-1 [file inline-supplementary-material-1.pdf]

**Supplementary tables**

|                                 | Placebo Group<br>(n=198) | Dexamethasone group<br>(n=203) |
|---------------------------------|--------------------------|--------------------------------|
| <i>Streptococcus pneumoniae</i> | 35 (18) <sup>1</sup>     | 40 (20) <sup>2</sup>           |
| <i>Legionella spp.</i>          | 15 (8) <sup>3</sup>      | 12 (6) <sup>4</sup>            |
| <i>Haemophilus influenzae</i>   | 8 (4) <sup>5</sup>       | 7 (3) <sup>6</sup>             |
| <i>Mycoplasma pneumoniae</i>    | 6 (3)                    | 6 (3)                          |
| <i>Chlamydia psittaci</i>       | 4 (2)                    | 2 (1)                          |
| <i>Staphylococcus aureus</i>    | 4 (2) <sup>7</sup>       | 1 (0) <sup>8</sup>             |
| Influenza A/B virus             | 9 (5) <sup>9</sup>       | 8 (4)                          |
| Other pathogen*                 | 3 (2) <sup>10</sup>      | 5 (2) <sup>11</sup>            |
| Other viruses†                  | 5 (3)                    | 6 (3)                          |
| Unidentified                    | 109 (55)                 | 116 (57)                       |

\*Other pathogens: *Coxiella burnetti*, *Pneumocystis jiroveci*, *Escheria coli*, group A streptococci, *Haemophilus haemolyticus*, *chlamydia pneumoniae*, *Neisseria meningitidis*

†Other viruses: Parainfluenza virus, Rhinovirus, Respiratory syncytial virus, human metapneumovirus (hMPV).

<sup>1</sup>Mixed infection with: influenza A virus (n=1), *Moraxella catarrhalis* (n= 1), hMPV (n=1), Rhinovirus (n=2), *H. influenzae* (n = 1), *H. influenza* and Rhinovirus (n=1).

<sup>2</sup>Mixed infection with: *S. aureus* (n=1), Influenza type A (n=2), *H. influenza* (n=1), *E. coli* (n=1)

<sup>3</sup>Mixed infection with: hMPV (n=1), Influenza type B (n=1)

<sup>4</sup>Mixed infection with: *S. pneumoniae* (n=1)

<sup>5</sup>Mixed infection with: *S. aureus* (n=2), Influenza type A (n=1)

<sup>6</sup>Mixed infection with: *Klebsiella pneumoniae* and *E. coli* (n=1), Influenza type A virus (n=2)

<sup>7</sup>Mixed infection with: *Pseudomonas aeruginosa* and Rhinovirus (n=1)

<sup>8</sup>Mixed infection with: Rhinovirus (n=1)

<sup>9</sup>Mixed infection with: *Candida albicans* (n=1)

<sup>10</sup>Mixed infection with: Rhinovirus (n=1), *M. pneumoniae* (n=1)

<sup>11</sup>Mixed infection with: Rhinovirus (n=1)

**Table E1 Etiological diagnosis for all enrolled patients**

|                                                                              | Dexamethasone group<br>(n= 203) | Placebo group<br>(n= 198) |
|------------------------------------------------------------------------------|---------------------------------|---------------------------|
| Penicillin monotherapy*                                                      | 81 (40)                         | 80 (40)                   |
| Cephalosporin monotherapy                                                    | 31 (15)                         | 28 (14)                   |
| Fluoroquinolone, macrolide or<br>doxycycline monotherapy                     | 5 (3)                           | 10 (5)                    |
| Penicillin combined with a<br>fluoroquinolone, macrolide or doxycycline      | 38 (19)                         | 37 (19)                   |
| Cephalosporin combined with a<br>fluoroquinolone, macrolide or doxycycline   | 36 (18)                         | 32 (16)                   |
| Other                                                                        | 10 (5)                          | 10 (5)                    |
| Unknown                                                                      | 2 (1)                           | 1 (1)                     |
| Data are number (%). *Penicillin, amoxicillin or amoxicilline/clavuanicacid. |                                 |                           |

**Table E2 Initial antibiotic regimen at time of hospital admission**

| Endpoint                       | Dexamethasone<br>(n=180) | Placebo<br>(n=166) | risk ratio (95% CI)    | p-value |
|--------------------------------|--------------------------|--------------------|------------------------|---------|
| <b>Length of stay (days)</b>   |                          |                    |                        |         |
| All patients                   | 4.5 (4.2 to 4.8)         | 5.0 (4.6 to 5.4)   |                        | 0.021*  |
| PSI class I-III                | 4.0 (3.6 to 4.4)         | 5.0 (4.5 to 5.5)   |                        | 0.054*  |
| PSI class IV-V                 | 5.5 (4.4 to 6.6)         | 6.5 (5.5 to 7.5)   |                        | 0.16*   |
| <b>Secondary ICU admission</b> |                          |                    |                        |         |
| All patients                   | 4 (2)                    | 12 (7)             | RR 0.31 (0.10 to 0.93) | 0.027‡  |
| PSI class I-III                | 0 (0)                    | 6 (6)              | -                      | 0.009‡  |
| PSI class IV-V                 | 4 (6)                    | 6 (9)              | RR 0.65 (0.19 to 2.18) | 0.48‡   |
| <b>30-day mortality</b>        |                          |                    |                        |         |
| All patients                   | 3 (2)                    | 7(4)               | RR 0.40 (0.10 to 1.50) | 0.16‡   |
| PSI class I-III                | 0(0)                     | 2 (2)              | -                      | 0.13‡   |
| PSI class IV-V                 | 3 (5)                    | 5 (8)              | RR 0.58 (0.14 to 2.33) | 0.44‡   |

Data are median (95% CI) or number (%). ICU = Intensive care unit. PSI = Pneumonia Severity Index. RR = Risk ratio.

\*Gehan-Breslow-Wilcoxon test. ‡Chi-squared test. Numbers analysed: PSI I-III placebo (n= 102) and dexamethasone (n=114). PSI IV-V: placebo (n= 64) and dexamethasone (n=66).

**Table E3: Overview of primary and secondary endpoints for the per-protocol population.**

| Endpoint                                 | Dexamethasone    | Placebo          | risk ratio (95% CI)    | p-value |
|------------------------------------------|------------------|------------------|------------------------|---------|
| <b>Length of stay (days)</b>             |                  |                  |                        |         |
| Initial CRP at admission                 |                  |                  |                        |         |
| CRP < 210 mg/l                           | 4.5 (4.0 to 5.0) | 5.0 (4.6 to 5.4) |                        | 0.28*   |
| CRP ≥ 210 mg/l                           | 5.0 (4.4 to 5.6) | 5.5 (4.9 to 6.1) |                        | 0.046*  |
| Pneumococcal urinary antigen test result |                  |                  |                        |         |
| Positive                                 | 5.0 (3.9 to 6.1) | 6.0 (5.2 to 6.8) |                        | 0.45*   |
| Negative                                 | 4.5 (4.1 to 4.9) | 5.0 (4.5 to 5.5) |                        | 0.034*  |
| <b>Secondary ICU admission</b>           |                  |                  |                        |         |
| Initial CRP at admission                 |                  |                  |                        |         |
| CRP < 210 mg/l                           | 3 (3)            | 6 (6)            | RR 0.54 (0.14 to 2.11) | 0.37‡   |
| CRP ≥ 210 mg/l                           | 2 (2)            | 8 (9)            | RR 0.22 (0.05 to 1.01) | 0.031‡  |
| Pneumococcal urinary antigen test result |                  |                  |                        |         |
| Positive                                 | 0 (0)            | 0 (0)            | -                      | -       |
| Negative                                 | 4 (3)            | 11 (7)           | RR 0.38 (0.12 to 1.17) | 0.078‡  |
| <b>30-day mortality</b>                  |                  |                  |                        |         |
| Initial CRP at admission                 |                  |                  |                        |         |
| CRP < 210 mg/l                           | 3 (3)            | 5 (5)            | RR 0.65 (0.16 to 2.65) | 0.54‡   |
| CRP ≥ 210 mg/l                           | 1 (1)            | 2 (2)            | RR 0.44 (0.04 to 4.77) | 0.49‡   |
| Pneumococcal urinary antigen test result |                  |                  |                        |         |
| Positive                                 | 0 (0)            | 1 (4)            | -                      | 0.26‡   |
| Negative                                 | 4 (3)            | 5 (3)            | RR 0.84 (0.23 to 3.06) | 0.79‡   |

Data are median (95% CI) or number (%). ICU = Intensive care unit. RR = Risk ratio. CRP = C-reactive protein. Numbers analysed (dexamethasone/placebo): CRP < 210 mg/l (96/104), CRP ≥ 210 mg/l (107/94), Positive pneumococcal urinary

antigen test result (32/26), negative pneumococcal urinary antigen test result (154/161). \*Grehan-Breslow-Wilcoxon test.  
‡Chi-squared test.

***Table E4*** Overview primary and secondary endpoints for subgroup analyses

| <b>Patients</b>      | <b>Age</b> | <b>PSI class</b> | <b>Reason for ICU admission</b>                 |
|----------------------|------------|------------------|-------------------------------------------------|
| <b>Placebo</b>       |            |                  |                                                 |
| <b>1</b>             | 42         | 3                | Respiratory failure                             |
| <b>2</b>             | 82         | 4                | Respiratory failure                             |
| <b>3</b>             | 75         | 3                | Respiratory failure                             |
| <b>4</b>             | 81         | 4                | Respiratory failure                             |
| <b>5</b>             | 67         | 3                | Observation after VATS <sup>1</sup> for empyema |
| <b>6</b>             | 85         | 3                | Respiratory failure                             |
| <b>7</b>             | 69         | 2                | Observation after VATS for empyema              |
| <b>8</b>             | 66         | 3                | Respiratory failure                             |
| <b>9</b>             | 59         | 4                | Respiratory failure                             |
| <b>10</b>            | 58         | 4                | Respiratory failure                             |
| <b>11</b>            | 85         | 4                | Sepsis; Hypotension                             |
| <b>12</b>            | 65         | 4                | Respiratory failure                             |
| <b>13</b>            | 56         | 4                | Respiratory failure                             |
| <b>14</b>            | 80         | 5                | Sepsis; Hypotension                             |
| <b>Dexamethasone</b> |            |                  |                                                 |
| <b>1</b>             | 76         | 4                | Respiratory failure                             |
| <b>2</b>             | 52         | 4                | Respiratory failure                             |
| <b>3</b>             | 85         | 5                | Arrhythmia with hypotension                     |
| <b>4</b>             | 85         | 4                | Respiratory failure                             |
| <b>5</b>             | 80         | 4                | Respiratory failure and pulmonary hemorrhage    |

<sup>1</sup>Video assisted thoracic surgery

**Table E5 Reasons for ICU admission.**

| <b>Patients</b>       | <b>Age</b> | <b>PSI risk class</b> | <b>Cause of death</b>                                                       |
|-----------------------|------------|-----------------------|-----------------------------------------------------------------------------|
| <b>Placebo</b>        |            |                       |                                                                             |
| <b>1</b>              | 82         | 4                     | Respiratory failure; Severe legionella pneumonia                            |
| <b>2</b>              | 75         | 3                     | Respiratory failure; post-obstruction pneumonia newly diagnosed lung tumor  |
| <b>3</b>              | 67         | 3                     | Died after VATS <sup>1</sup> for empyema                                    |
| <b>4</b> <sup>*</sup> | 58         | 4                     | Sepsis; Respiratory failure                                                 |
| <b>5</b>              | 85         | 4                     | Sepsis                                                                      |
| <b>6</b>              | 77         | 4                     | Respiratory failure due to influenza pneumonia and congestive heart failure |
| <b>7</b>              | 84         | 4                     | Respiratory failure after opting for palliative care                        |
| <b>8</b>              | 81         | 4                     | Died 3 days after discharge; unknown cause of death                         |
| <b>Dexamethasone</b>  |            |                       |                                                                             |
| <b>1</b> <sup>*</sup> | 76         | 4                     | Died after ICU discharge due to multiple complications                      |
| <b>2</b>              | 80         | 4                     | Respiratory failure; Pulmonary hemorrhage                                   |
| <b>3</b>              | 79         | 3                     | Strangulated femoral hernia after readmission                               |
| <b>4</b>              | 82         | 4                     | Respiratory failure; pulmonary infection and congestive heart failure       |
| <b>5</b>              | 94         | 5                     | Died 10 days after discharge; unknown cause of death                        |

<sup>\*</sup>Died in hospital after 30 days of hospital admission. <sup>1</sup>Video assisted thoracic surgery.

**Table E6 Cause of death**



| Patients      | Age | PSI risk class | Reason for readmission                                                          |
|---------------|-----|----------------|---------------------------------------------------------------------------------|
| Placebo       |     |                |                                                                                 |
| 1             | 52  | 3              | Antrum gastritis                                                                |
| 2             | 70  | 3              | Mediastinitis                                                                   |
| 3             | 44  | 1              | Hospital-acquired pneumonia; urticarial reaction to amoxicillin/clavulanic acid |
| 4             | 90  | 4              | Urosepsis                                                                       |
| 5             | 54  | 3              | Relapse of pulmonary infection                                                  |
| 6             | 71  | 4              | Psychiatric complaints                                                          |
| 7             | 40  | 1              | Bronchiolitis                                                                   |
| 8             | 67  | 3              | Relapse of pulmonary infection                                                  |
| 9             | 71  | 5              | Relapse of pulmonary infection                                                  |
| Dexamethasone |     |                |                                                                                 |
| 1             | 79  | 3              | Strangulated femoral hernia                                                     |
| 2             | 82  | 4              | Relapse of pulmonary infection and congestive heart failure                     |
| 3             | 69  | 5              | Congestive heart failure                                                        |
| 4             | 74  | 3              | Relapse of pulmonary infection                                                  |
| 5             | 56  | 2              | Altered mental status                                                           |
| 6             | 84  | 4              | Hospital-acquired pneumonia                                                     |

|    |    |                                                  |
|----|----|--------------------------------------------------|
| 7  | 61 | 2 Angina Pectoris                                |
| 8  | 46 | 1 Relapse of pulmonary infection                 |
| 9  | 76 | 4 Relapse of pulmonary infection                 |
| 10 | 61 | 2 Elective cardioversion for atrial fibrillation |
| 11 | 85 | 5 Fever of unknown origin                        |
| 12 | 54 | 2 Urine retention                                |
| 13 | 56 | 2 Relapse of pulmonary infection                 |
| 14 | 61 | 3 Chest pain caused by pleurisy                  |
| 15 | 61 | 5 Ischemic cerebrovascular accident              |
| 16 | 84 | 4 Fatigue                                        |
| 17 | 27 | 1 Relapse of pulmonary infection                 |
| 18 | 71 | 4 Dehydration and altered mental status          |
| 19 | 64 | 4 Relapse of pulmonary infection                 |
| 20 | 85 | 4 Acute decompensated heart failure              |

**Table E7 Reasons for readmission < 30 days of admission**
