# Supplementary material
Source: HighWire-hosted journal article supplement (https://erj.ersjournals.com/content/58/2/2002535)
Supplement: inline-supplementary-material-4 [file inline-supplementary-material-4.pdf]

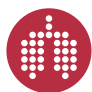

# Adjunctive treatment with oral dexamethasone in non-ICU patients hospitalised with community-acquired pneumonia: a randomised clinical trial

SHAREABLE PDF

Esther Wittermans<sup>1</sup>, Stefan M.T. Vestjens<sup>1</sup>, Simone M.C. Spoorenberg<sup>1</sup>, Willem L. Blok<sup>2</sup>, Jan C. Grutters<sup>3,4</sup>, Rob Janssen<sup>5</sup>, Ger T. Rijkers<sup>6</sup>, Frank W.J.M. Smeenk<sup>7</sup>, G. Paul Voorn<sup>8</sup>, Ewoudt M.W. van de Garde<sup>9,10</sup>, Willem Jan W. Bos<sup>1,11</sup> and the Santeon-CAP Study Group<sup>12</sup>

<sup>1</sup>Dept of Internal Medicine, St Antonius Hospital, Nieuwegein, The Netherlands. <sup>2</sup>Dept of Internal Medicine, OLVG, Amsterdam, The Netherlands. <sup>3</sup>Dept of Pulmonology, St Antonius Hospital, Nieuwegein, The Netherlands. <sup>4</sup>Division of Heart and Lungs, University Medical Center Utrecht, Utrecht, The Netherlands. <sup>5</sup>Dept of Pulmonology, Canisius Wilhelmina Hospital, Nijmegen, The Netherlands. <sup>6</sup>Dept of Science, University College Roosevelt, Middelburg, The Netherlands. <sup>7</sup>Dept of Pulmonology, Catharina Hospital, Eindhoven, The Netherlands. <sup>8</sup>Dept of Medical Microbiology and Immunology, St Antonius Hospital, Nieuwegein, The Netherlands. <sup>9</sup>Dept of Clinical Pharmacology, St Antonius Hospital, Nieuwegein, The Netherlands. <sup>10</sup>Division of Pharmacoepidemiology and Clinical Pharmacology, Faculty of Science, Utrecht University, Utrecht, The Netherlands. <sup>11</sup>Division of Nephrology, Dept of Internal Medicine, Leiden University Medical Center, Leiden, The Netherlands. <sup>12</sup>The complete membership of the Santeon-CAP Study Group is provided in the Acknowledgements.

Corresponding author: Esther Wittermans (e.wittermans@antoniusziekenhuis.nl)

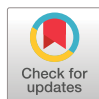

Shareable abstract (@ERSpublications)

**Adjunctive treatment with oral dexamethasone in adults hospitalised with community-acquired pneumonia (CAP) reduced length of stay and ICU admission rate. However, it remains unclear for which CAP subgroup the risk-benefit ratio is optimal.** <https://bit.ly/35tXfPX>

**Cite this article as:** Wittermans E, Vestjens SMT, Spoorenberg SMC, *et al.* Adjunctive treatment with oral dexamethasone in non-ICU patients hospitalised with community-acquired pneumonia: a randomised clinical trial. *Eur Respir J* 2021; 58: 2002535 [DOI: 10.1183/13993003.02535-2020].

This single-page version can be shared freely online.

Copyright ©The authors 2021. For reproduction rights and permissions contact [permissions@ersnet.org](mailto:permissions@ersnet.org)

This article has supplementary material available from [erj.ersjournals.com](http://erj.ersjournals.com)

Received: 3 July 2020  
Accepted: 27 Dec 2020

## Abstract

**Background** Adjunctive intravenous corticosteroid treatment has been shown to reduce length of stay (LOS) in adults hospitalised with community-acquired pneumonia (CAP). We aimed to assess the effect of oral dexamethasone on LOS and whether this effect is disease severity dependent.

**Methods** In this multicentre, stratified randomised, double-blind, placebo-controlled trial, immunocompetent adults with CAP were randomly assigned (1:1 ratio) to receive oral dexamethasone (6 mg once daily) or placebo for 4 days in four teaching hospitals in the Netherlands. Randomisation (blocks of four) was stratified by CAP severity (pneumonia severity index class I–III and IV–V). The primary outcome was LOS.

**Results** Between December 2012 and November 2018, 401 patients were randomised to receive dexamethasone (n=203) or placebo (n=198). Median LOS was shorter in the dexamethasone group (4.5 days, 95% CI 4.0–5.0 days) than in the placebo group (5.0 days, 95% CI 4.6–5.4 days; p=0.033). Within both CAP severity subgroups, differences in LOS between treatment groups were not statistically significant. The secondary ICU admission rate was lower in the dexamethasone arm (5 (3%) *versus* 14 (7%); p=0.030); 30-day mortality did not differ between groups. In the dexamethasone group the rate of hospital readmission tended to be higher (20 (10%) *versus* 9 (5%); p=0.051) and hyperglycaemia (14 (7%) *versus* 1 (1%); p=0.001) was more prevalent.

**Conclusion** Oral dexamethasone reduced LOS and ICU admission rate in adults hospitalised with CAP. It remains unclear for which patients the risk-benefit ratio is optimal.
